# Supplementary material
Source: bioRxiv or medRxiv preprint supplement (https://www.biorxiv.org/highwire/filestream/38628/field_highwire_adjunct_files/0/131367-1.pdf)
Supplement: Supplementary file [file 131367-1.pdf]

**Table S1.A. Summary of integrated feature set datasets.**

| Dataset | Histology / subtype                  | Samples | Median survival - days (deceased) | Median follow up - days (right censored) | Proportion censored (%) |
|---------|--------------------------------------|---------|-----------------------------------|------------------------------------------|-------------------------|
| BRCA    | Breast invasive carcinoma            | 524     | 1053                              | 928.5                                    | 90.5                    |
| GBMLGG  | Glioma                               | 560     | 480                               | 566                                      | 64.1                    |
|         | IDH wild-type                        | 203     | 375.5                             | 294                                      | 32.0                    |
|         | IDH mutant / 1p19q co-deleted        | 145     | 947.5                             | 651                                      | 87.6                    |
|         | IDH mutant / non co-deleted          | 209     | 1262                              | 608.5                                    | 79.4                    |
| KIPAN   | Kidney Carcinoma                     | 641     | 793                               | 1360.5                                   | 72                      |
|         | Renal cell chromophobe (KICH)        | 43      | 855                               | 56                                       | 88.4                    |
|         | Renal clear cell (KIRC)              | 407     | 822                               | 1488                                     | 64.8                    |
|         | Renal papillary cell (KIRP)          | 191     | 624                               | 761                                      | 84.8                    |
| OV*     | Ovarian serous cystadenocarcinoma    | 206     | 1201                              | 1284.5                                   | 30                      |
| UCEC*   | Uterine Corpus Endometrial Carcinoma | 194     | 726                               | 1106                                     | 86                      |

**Table S1.B. Summary of transcriptional feature set datasets.**

| Dataset | Histology / subtype                  | Samples | Median survival - days (deceased) | Median follow up - days (right censored) | Proportion censored (%) |
|---------|--------------------------------------|---------|-----------------------------------|------------------------------------------|-------------------------|
| BRCA    | Breast invasive carcinoma            | 1092    | 1272                              | 761                                      | 86                      |
| GBMLGG  | Glioma                               | 692     | 510                               | 608                                      | 62                      |
|         | IDH wild-type                        | 239     | 383                               | 415                                      | 29                      |
|         | IDH mutant / 1p19q co-deleted        | 171     | 962                               | 682                                      | 87                      |
|         | IDH mutant / non co-deleted          | 267     | 1246.5                            | 685                                      | 77                      |
| KIPAN   | Kidney Carcinoma                     | 887     | 787.5                             | 1213                                     | 74                      |
| OV*     | Ovarian serous cystoadenocarcinoma   | 306     | 1082                              | 761                                      | 40                      |
| UCEC*   | Uterine Corpus Endometrial Carcinoma | 370     | 714                               | 1098                                     | 84                      |
